# Supplementary material for: Selective loss of function variants in IL6ST cause Hyper-IgE syndrome with distinct impairments of T-cell phenotype and function
Source: PubMed Central journal article supplement — Haematologica. 2018 Oct 11;104(3):609–21. doi: 10.3324/haematol.2018.194233 (PMC6395342; doi:10.3324/haematol.2018.194233), 2019-03

## Selective loss of function variants in *IL6ST* cause Hyper-IgE syndrome with distinct impairments of T-cell phenotype and function

Tala Shahin,<sup>1,2\*</sup> Dominik Aschenbrenner,<sup>3\*</sup> Deniz Cagdas,<sup>4,5\*</sup> Sevgi Köstel Bal,<sup>1,2,6</sup> Cecilia Domínguez Conde,<sup>1,2</sup> Wojciech Garncarz,<sup>1,2</sup> David Medgyesi,<sup>1,2</sup> Tobias Schwerd,<sup>3,7</sup> Betül Karaatmaca,<sup>4</sup> Pınar Gur Cetinkaya,<sup>4</sup> Saliha Esenboga,<sup>4</sup> Stephen R. F. Twigg,<sup>8</sup> Andrew Cant,<sup>9</sup> Andrew O. M. Wilkie,<sup>8</sup> İlhan Tezcan,<sup>4,5</sup> Holm H. Uhlig<sup>3,10</sup> and Kaan Boztug<sup>1,2,11,12</sup>

<sup>1</sup>Ludwig Boltzmann Institute for Rare and Undiagnosed Diseases, Vienna, Austria; <sup>2</sup>CeMM Research Center for Molecular Medicine of the Austrian Academy of Sciences, Vienna, Austria; <sup>3</sup>Translational Gastroenterology Unit, John Radcliffe Hospital, University of Oxford, UK; <sup>4</sup>Section of Pediatric Immunology, İhsan Doğramacı Children's Hospital, Hacettepe University, Ankara, Turkey; <sup>5</sup>Institute of Child Health, Hacettepe University, Ankara, Turkey; <sup>6</sup>Department of Pediatric Allergy and Immunology, Ankara University School of Medicine, Cebeci, Turkey; <sup>7</sup>Dr. von Hauner Children's Hospital, Ludwig-Maximilians-University of Munich, Germany; <sup>8</sup>Clinical Genetics Group, MRC Weatherall Institute of Molecular Medicine, John Radcliffe Hospital, University of Oxford, UK; <sup>9</sup>Institute of Cellular Medicine, Newcastle University, Newcastle upon Tyne, UK; <sup>10</sup>Department of Paediatrics, University of Oxford, UK; <sup>11</sup>Department of Pediatrics and Adolescent Medicine, Medical University of Vienna, Austria and <sup>12</sup>St. Anna Kinderspital and Children's Cancer Research Institute, Department of Pediatrics, Medical University of Vienna, Austria

\*TSh, DA and DC contributed equally to this work. #HHU and KB are co-senior authors.

©2019 Ferrata Storti Foundation. This is an open-access paper. doi:10.3324/haematol.2018.194233

Received: March 26, 2018.

Accepted: October 3, 2018.

Pre-published: October 11, 2018.

Correspondence:

KAAN BOTZUG - kaan.boztug@rud.lbg.ac.at

HOLM H. UHLIG - holm.uhlig@ndm.ox.ac.uk

## Supplementary Data

### Methods

#### Exome sequencing and data analysis

Whole exome sequencing was performed using the TrueSeq Rapid Exome kit, Illumina HiSeq3000 system and the cBot cluster generator. Burrows-Wheeler Aligner was used to align reads against version 19 of the human genome as a reference. VCF.Filter tool<sup>1</sup> was used to filter out variants (annotated by SNPEFF) with a minor allele frequency (MAF) >0.01 in 1000 Genomes, ExAC or dbSNP. An internal database was also used to filter out recurrent variants. In the resulting list of variants homozygous changes were then subjected to prioritization using the combined annotation dependent depletion (CADD) tool<sup>2</sup> to predict deleteriousness.

#### Sanger sequencing

Validation and segregation of the GP130 variant P498L was performed on DNA from P<sup>P498L</sup> and family members by Sanger sequencing. DNA from the deceased sister and twin brothers was not available. The following primers were designed for amplification and sequencing: Forward: 5'-CCGAACAGTAGGTCCTTTGG-3', Reverse: 5'-CCACTGCATTGGCAATACTT-3'.

#### Patient-derived cells and KO cell line

T Lymphoblasts: T Lymphoblasts were generated by feeder cell-mediated T cell expansion. Irradiated feeder cells (PBMCs and JY cells) were added in a 1:1 ratio to patient PMBCs in T cell media (RPMI 1640 (Gibco) + 5% human serum + 1% penicillin/streptomycin + 1% HEPES) supplemented with IL-2 (100U, ImmunoTools) and PHA (1µg/ml; Sigma). T cells were allowed to expand for two weeks.

Epstein-Barr virus transformed lymphoblastoid cells (EBV-LCL): PBMCs freshly isolated from the patient, mother and healthy donor blood were incubated with EBV virus supernatant for one day followed by addition of 1 µg/ml cyclosporin A. Cells were grown in RPMI 1640 medium (Gibco) supplemented with 10% heat-inactivated fetal bovine serum (HI-FBS), 1% L-glutamine and 1% penicillin/streptomycin (all from Invitrogen).

CRISPR/Cas9 GP130 KO HEK293 cell line: The GP130 KO HEK293 cell line was established in house as described previously<sup>3</sup>. Cells were grown in DMEM with glutamine (Sigma) supplemented with 10% FCS (Sigma), 1% sodium-pyruvate (Gibco), 1% non-essential amino acids (Gibco), 1% penicillin/streptomycin (Gibco).

#### Plasmid and lentivirus production for reconstitution experiments

pcDNA3.1(+) vector coding for wildtype (WT) or mutant GP130, and wildtype IL-6RA and IL-11RA were purchased from GenScript and expanded in Stb13 *E. coli* (Thermo Fisher) according to standard protocols. Plasmids were purified using the EndoFree Plasmid Maxi Kit (Qiagen) or E.Z.N.A.® Endo-Free Plasmid Maxi Kit (Omega bio-tek).

For ectopic expression of WT *IL6ST* in patient-derived fibroblasts, infectious lentiviral particles were generated as described previously<sup>3</sup> with some adaptations. pLENTI7.3V5-DEST (Genart; Thermo

Fisher) carrying WT *IL6ST* was co-transfected into HEK293 cells using Lipofectamine2000 (Invitrogen) and the ViraPower lentiviral packaging mix (Invitrogen) according to the manufactures' instructions. HEK293 cell supernatants were filtered by passing through a 0.45 $\mu$ m filter and added to primary fibroblasts in 6-well plate cultures. Transduction efficiency was ~70% based on EmGFP expression. After 24 hours incubation cells were serum starved for 2 hours, followed by cytokine stimulation and p-STAT staining, as described in the Methods section of the article.

### **Transcription factor profiling**

The expression of T cell lineage-specifying transcription factors was analyzed following surface and intracellular co-staining of 0.5-1x10<sup>6</sup> total PBMCs. Cells were stained for surface markers and for the exclusion of dead cells as described below, fixed and permeabilized using the transcription factor staining buffer set (eBioscience), followed by flow cytometry analysis. The expression of transcription factors was detected with the following antibodies: FOXP3, GATA3, ROR $\gamma$ t and TBET.

### **TSNE-clustering**

t-Distributed Stochastic Neighbor Embedding (TSNE)-based analysis was performed on FCS files compensated for spillover between channels and gated on live CD3<sup>+</sup>CD4<sup>+</sup>CD8<sup>-</sup> or live CD3<sup>+</sup>CD8<sup>+</sup>CD4<sup>-</sup> single cells and randomly down-sampled to 10,000 (CD4<sup>+</sup>) or 3000 (CD8<sup>+</sup>) cells per sample. Individual FCS files were then concatenated to generate a single FCS file and subjected to tSNE unsupervised analysis using the FlowJo (Treestar) tSNE plugin<sup>4,5</sup>. The settings were: Iterations = 1000; Perplexity = 200; Eta = 20; Theta = 0.5. Clustering was performed on the following parameters: CD45RA, CD25, CD127, CCR4, CCR6, CCR7, CCR9, CCR10, CXCR3, CXCR5 and CRTh2. All patient T cell analysis were compared to matched 12-year old healthy donors samples (p.P498L) or 7-year old healthy donor samples (p.N404Y) that were stained and acquired on the same day.

### **Statistical analysis**

In cases when three or more independent experiments were performed, an unpaired two-tailed student *t*-test or Mann-Whitney-test were performed on Prism (version 5 or 7; GraphPad software, Inc.).

### **Protein sequence alignment**

Clustal Omega<sup>6</sup> was used to align multiple sequences from different species: NP002175 (Human), NP\_001252920 (Macaque), NP\_034690 (Mouse), NP\_990202 (Chicken) and NP\_001106976.

## Supplementary Tables

**Table S1.** List of Antibodies used for p-STAT assays, GP130 expression, extracellular surface staining, intracellular cytokine staining (ICCS), transcription factor (TF) and chemokine receptor (CCR) profiling.

| Antibody-Fluorophore            | Clone              | Producer                  | Purpose                                                       |
|---------------------------------|--------------------|---------------------------|---------------------------------------------------------------|
| CD3-FITC                        | UCHT1              | Beckman Coulter           | p-STAT Assay                                                  |
| CD4-BV605                       | RPA-T4             | BD Pharmigen              |                                                               |
| CD8-V450                        | RPA-T8             | BD Horizon                |                                                               |
| CD19-PECy7                      | J3-119             | Beckman Coulter           |                                                               |
| pSTAT1-BV421                    | 4a (pY701)         | BD Phosflow               |                                                               |
| pSTAT2-FITC                     | Polyclonal (pY689) | Thermofisher              |                                                               |
| pSTAT3-AF647                    | 4/P-STAT3 (pY701)  | BD Phosflow               |                                                               |
| pSTAT4-PE                       | T693 (pY693)       | BD Biosciences            |                                                               |
| pSTAT5-PECy7                    | 47/Stat5 (pY694)   | BD Biosciences            |                                                               |
| pSTAT6-PerCPCy5.5               | 18/P-Stat6 (pY641) | BD Biosciences            |                                                               |
| IL-4-APC                        | MP4-25D2           | BD Biosciences            | ICCS                                                          |
| IL-10-PECy7                     | JES3-9D7           | eBioscience               |                                                               |
| IL-13-FITC                      | 85BRD              | eBioscience               |                                                               |
| IL-17A-eF450                    | eBio64DEC17        | eBioscience               |                                                               |
| IL-22-PE                        | 22URTI             | eBioscience               |                                                               |
| IFN $\gamma$ -PE-Dazzle or FITC | 4S.B3              | Biolegend or eBiosciences |                                                               |
| TNF $\alpha$ -BV605             | MAb11              | Biolegend                 |                                                               |
| FOXP3-APC                       | PCH101             | eBioscience               | TF profiling                                                  |
| GATA3-AF488                     | TWAJ               | eBioscience               |                                                               |
| ROR $\gamma$ T-PE or AF647      | Q21-559            | BD Biosciences            |                                                               |
| TBET-BV711 or PerCPCy5.5        | 4B10               | Biolegend                 |                                                               |
| CD130-BV421                     | AM64               | BD Biosciences            |                                                               |
| CD4-BV421                       | RPA-T4             | BD Biosciences            | GP130 expression                                              |
| CD3-BV711, PECy5 or PE-Tr       | UCHT1              | BD Biosciences            | Extracellular surface staining for ICCS, TF and CCR Profiling |
| CD3-APC-H7                      | SK7                | BD Biosciences            |                                                               |

|                              |               |                 |                                                               |
|------------------------------|---------------|-----------------|---------------------------------------------------------------|
| $\alpha\beta$ TCR-PerCPCy5.5 | <i>IP26</i>   | Biolegend       | Extracellular surface staining for ICCS, TF and CCR Profiling |
| CD4-BV510                    | <i>RPA-T4</i> | Biolegend       |                                                               |
| CD4-PECy7                    | SFCI12T4D11   | Beckman Coulter |                                                               |
| CD8-AF700                    | <i>RPA-T8</i> | Biolegend       |                                                               |
| CD8-V500                     | <i>RPA-T8</i> | BD Biosciences  |                                                               |
| CD25-BV785                   | MA-A251       | Biolegend       |                                                               |
| CD25-PE                      | MA-A251       | BD Biosciences  |                                                               |
| CD45RA-BV650                 | HI100         | Biolegend       |                                                               |
| CD45RA-AF700                 | HI100         | BD Biosciences  |                                                               |
| CD127-BV570                  | A019D5        | Biolegend       |                                                               |
| CCR4-PECy7                   | 1G1           | BD Biosciences  |                                                               |
| CCR6-BV605                   | G034E3        | Biolegend       |                                                               |
| CCR7-BV421                   | G043H7        | Biolegend       |                                                               |
| CCR7-PE-CF594                | 150503        | BD Biosciences  |                                                               |
| CCR9-APC                     | L053E8        | Biolegend       |                                                               |
| CCR10-PE                     | 314305        | R&D             |                                                               |
| CXCR3-PECy5 or<br>BV711      | 1C6           | BD Biosciences  |                                                               |
| CXCR5-PE-Dazzle              | J252D4        | Biolegend       |                                                               |
| CRTh2-FITC                   | BM16          | BD Biosciences  |                                                               |
| GP130-BV421                  | <i>AM64</i>   | BD Biosciences  |                                                               |

**Table S2.** NIH-HIES score calculated on the basis of the clinical manifestations of P<sup>P498L</sup>.

| <i>Clinical Findings</i>                     | <i>P<sup>P498L</sup></i> |
|----------------------------------------------|--------------------------|
| <i>Highest serum-IgE level (IU/ml)</i>       | 10                       |
| <i>Skin abscesses</i>                        | 0                        |
| <i>Pneumonia (episodes over lifetime)</i>    | 8                        |
| <i>Parenchymal lung anomalies</i>            | 8                        |
| <i>Retained primary teeth</i>                | 0                        |
| <i>Scoliosis, maximum curvature</i>          | 8                        |
| <i>Fractures with minor trauma</i>           | 0                        |
| <i>Highest eosinophil count (cells/ml)</i>   | 6                        |
| <i>Characteristic face</i>                   | 2                        |
| <i>Midline anomaly</i>                       | 0                        |
| <i>Newborn rash</i>                          | 0                        |
| <i>Eczema (worst stage)</i>                  | 4                        |
| <i>Upper respiratory infections per year</i> | 2                        |
| <i>Candidiasis</i>                           | 0                        |
| <i>Other serious infections</i>              | 4                        |
| <i>Fatal infection</i>                       | 0                        |
| <i>Hyperextensibility</i>                    | 2                        |
| <i>Lymphoma</i>                              | 0                        |
| <i>Increased nasal width</i>                 | 1                        |
| <i>High palate</i>                           | 2                        |
| <i>Young-age correction</i>                  | 0                        |
| <b><i>Total score</i></b>                    | <b>57</b>                |

**Table S3.** Summary of clinical manifestations present in P<sup>P498L</sup> and P<sup>N404Y</sup>.

| <i>Organ Affected</i>   | <i>Phenotype</i>                                                | <i>P<sup>P498L</sup></i><br>(12.5 years) | <i>P<sup>N404Y</sup></i><br>(7 years) |
|-------------------------|-----------------------------------------------------------------|------------------------------------------|---------------------------------------|
| <i>Growth</i>           | Short stature (height < 3rd percentile)                         | ✓                                        | Not assessed                          |
| <i>Skin</i>             | Eczema                                                          | ✓                                        | ✓                                     |
| <i>Head and neck</i>    | Scaphocephaly (Craniosynostosis)                                | ✓                                        | ✓                                     |
|                         | Retained teeth                                                  | ✓                                        | ✓                                     |
| <i>Bones and joints</i> | Scoliosis (30° thoracolumbar curve)                             | ✓                                        | ✓                                     |
|                         | Flexion contracture of the small joints of the hands and elbows | ✓                                        | ✓                                     |
|                         | Hip dislocation                                                 | ✓                                        | ✓                                     |
|                         | Destructive arthropathy                                         | ✓                                        | Not assessed                          |
| <i>Infections</i>       | Recurrent upper respiratory tract infections                    | ✓                                        | ✓                                     |
|                         | Recurrent otitis media                                          | ✓                                        | ✗                                     |
|                         | Recurrent pneumonia, empyema and pneumatocele                   | ✓                                        | ✓                                     |
|                         | Bilateral keratitis                                             | ✓                                        | ✓                                     |
|                         | Fungal lesions                                                  | ✓                                        | ✗                                     |
| <i>Nervous system</i>   | Mental motor retardation                                        | ✓                                        | ✓                                     |

**Table S4.** Homozygous, non-synonymous rare variants (minor allele frequency (MAF) <0.01 using the ExAC database) found in subject P<sup>P498L</sup>. CADD algorithm was used to predict functional damage of variants.

| <i>Gene</i>     | <i>Chr</i> | <i>Position</i> | <i>Reference allele</i> | <i>Alternative allele</i> | <i>Amino acid change</i> | <i>dbSNP</i> | <i>MAF (ExAC)</i> | <i>CADD score</i> |
|-----------------|------------|-----------------|-------------------------|---------------------------|--------------------------|--------------|-------------------|-------------------|
| <i>IL6ST</i>    | 5          | 55248137        | G                       | A                         | P498L                    | .            | NA                | 31.0              |
| <i>WDR36</i>    | 5          | 110454719       | A                       | G                         | D658G                    | rs34595252   | 4.209e-03         | 29.4              |
| <i>APC*</i>     | 5          | 112175240       | G                       | C                         | E1317Q                   | rs1801166    | 4.126e-03         | 7.7               |
| <i>MCC</i>      | 5          | 112720862       | A                       | G                         | V73A                     | .            | NA                | 25.6              |
| <i>HSD17B4</i>  | 5          | 118850709       | G                       | A                         | A516T                    | rs28943591   | 3.114e-03         | 23.0              |
| <i>GRM6</i>     | 5          | 178418549       | T                       | C                         | I245V                    | rs62638207   | 4.143e-03         | 19.7              |
| <i>CRB2</i>     | 9          | 126133161       | G                       | T                         | R610L                    | rs144365725  | 2.636e-04         | 11.2              |
| <i>SOHLH1</i>   | 9          | 138590970       | C                       | G                         | G23A                     | rs201456816  | 1.766e-04         | 7.2               |
| <i>C10orf99</i> | 10         | 85944516        | G                       | T                         | Q80H                     | rs76221724   | 3.937e-03         | 24.2              |
| <i>CXCR5</i>    | 11         | 118764497       | A                       | C                         | T82P                     | rs202087123  | 8.236e-05         | 19.0              |
| <i>USP2</i>     | 11         | 119243713       | G                       | A                         | R160W                    | rs200291387  | 3.954e-04         | 22.8              |
| <i>LTB4R</i>    | 14         | 24785092        | G                       | T                         | A79S                     | rs34645221   | 4.876e-03         | 11.8              |
| <i>RBBP6</i>    | 16         | 24581416        | G                       | C                         | E1135D                   | rs112763526  | 4.945e-05         | 17.97             |
| <i>SLC5A11</i>  | 16         | 24902246        | G                       | A                         | A241T                    | .            | NA                | 23.0              |
| <i>KIAA0556</i> | 16         | 27751497        | G                       | A                         | E627K                    | rs186875199  | 1.450e-03         | 12.8              |
| <i>CLPTM1</i>   | 19         | 45494509        | A                       | G                         | Y478C                    | rs140564801  | 1.137e-03         | 28.7              |
| <i>PIGA</i>     | X          | 15349359        | T                       | A                         | S232C                    | .            | NA                | 25                |

\* The nonsynonymous variant in APC (p.E1317Q) has been described in some patients with familial forms of polyposis coli and colorectal cancer in heterozygous forms<sup>7,8</sup>. The penetrance is not complete and homozygous forms have not been evaluated.

## References

1. Müller H, Jimenez-Heredia R, Krolo A, et al. VCF.Filter: interactive prioritization of disease-linked genetic variants from sequencing data. *Nucleic Acids Res* 2017;45(W1):W567–W572.
2. Kircher M, Witten DM, Jain P, O’Roak BJ, Cooper GM, Shendure J. A general framework for estimating the relative pathogenicity of human genetic variants. *Nat Genet* 2014;46(3):310–315.
3. Schwerd T, Twigg SRF, Aschenbrenner D, et al. A biallelic mutation in *IL6ST* encoding the GP130 co-receptor causes immunodeficiency and craniosynostosis. *J Exp Med* 2017;214(9):2547–2562.
4. Maaten L van der, Hinton G. Visualizing Data using t-SNE. *J Mach Learn Res*

2008;9(Nov):2579–2605.

5. Wallach I, Lilien R. The protein–small-molecule database, a non-redundant structural resource for the analysis of protein-ligand binding. *Bioinforma Orig Pap* 2009;25(5):615–62010.
6. Sievers F, Wilm A, Dineen D, et al. Fast, scalable generation of high-quality protein multiple sequence alignments using Clustal Omega. *Mol Syst Biol* 2014;7(1):539–539.
7. Gismondi V, Bonelli L, Sciallero S, et al. Prevalence of the E1317Q Variant of the *APC* Gene in Italian Patients with Colorectal Adenomas. *Genet Test* 2002;6(4):313–317.
8. Lamlum H, Al Tassan N, Jaeger E, et al. Germline *APC* variants in patients with multiple colorectal adenomas, with evidence for the particular importance of E1317Q. *Hum Mol Genet* 2000;9(15):2215–2221.

## Supplementary Figure Legends

### Figure S1.

#### **Functional assessment of STAT family members' phosphorylation in GP130<sup>P498L</sup> T lymphoblasts.**

Bar graph summary of STAT1, STAT2, STAT3, STAT4, STAT5 and STAT6 phosphorylation following stimulation with 100 ng/ml (A) IL-6, (B) IL-27, (C) IL-4, (D) IL-12, (E) IL-21 or (F) IFN $\beta$  in T lymphoblasts from P<sup>P498L</sup> and two HDs. Data shown are from 2-3 independent experiments with 2 replicates each. t-test; \*p<0.05, \*\*p<0.01, \*\*\*p<0.001.

### Figure S2.

**Functional assessment of GP130<sup>P498L</sup> fibroblast p-STAT1 response.** (A) Dose-escalation curves showing relative mean fluorescence intensity (rMFI) of p-STAT1 after stimulation of P<sup>P498L</sup> and HD fibroblasts as well as P<sup>P498L</sup> fibroblasts transduced with wild-type (WT) GP130 with IL-6, IL-11, IL-27, LIF or OSM. Bar graphs (right) showing rMFI of fibroblasts upon stimulation with the highest concentration of the corresponding cytokine (3 (HD), 4 (p.P498L) and 2 (p.P498L + WT GP130) replicates of 2 independent experiments). (B) Dot-plot presentation of p-STAT1 and p-STAT3 co-stained fibroblasts according to (A) following stimulation with 100 ng/ml IL-6, IL-11, IL-27, LIF or OSM.

### Figure S3.

**Profiling of CD4<sup>+</sup> and CD8<sup>+</sup> T cells chemokine receptor expression.** Bar graph summary of (A and B) CD4<sup>+</sup> and (C and D) CD8<sup>+</sup> memory T cells chemokine receptor surface expression shown as frequency of live CD3<sup>+</sup>CD4<sup>+</sup>CD25<sup>-</sup> or CD3<sup>+</sup>CD8<sup>+</sup>CD25<sup>-</sup> T cells, respectively. Mean + SEM; HD age-matched controls (9-14 years): n = 10-11, HD age-matched controls (6-7 years): n = 6-9, P<sup>P498L</sup>: n = 2-5 independent replicates from PBMCs isolated at 3 distinct time points and at 7 and 4-month distance, P<sup>N404Y</sup>: n = 3 replicates from 2 independent experiments and PBMCs taken at 5-month distance. Mann-Whitney test; \*p<0.05, \*\*p<0.01, \*\*\*p<0.001, \*\*\*\*p<0.0001. Some healthy donor control data shown was previously published<sup>5</sup>.



#### Figure S4.

**Phenotypic characterization of CD8<sup>+</sup>CCR6<sup>+</sup> memory T cells.** (A) Summary of frequencies of TBET<sup>+</sup> and RORγt<sup>+</sup> cells as assessed by intracellular staining and expressed as frequencies of CD8<sup>+</sup> memory T cells. Mean + SEM; HD (adult): n = 28, HD age-matched controls (9-14 years): n = 8, HD age-matched controls (6-7 years): n = 7, P<sup>P498L</sup>: n = 4 replicates from two independent experiments from PBMCs isolated at two distinct time points and at 7-month distance, P<sup>N404Y</sup>: n = 3 replicates from two independent experiments and PBMCs taken at 5-month distance. (B) Dot-plot showing the expression of CCR6 and RORγt in CD8<sup>+</sup> memory T cells. (C) Dot-plot presentation illustrating the expression of TBET and RORγt in CD8<sup>+</sup> memory T cells. Gates were set using naïve CD8<sup>+</sup> T cells as internal negative control.

#### Figure S5.

**Evaluation of regulatory T cell frequencies.** (A) Bar graph summary of CD25<sup>+</sup>FOXP3<sup>+</sup> T cell frequencies gated on live CD3<sup>+</sup>CD4<sup>+</sup> cells: mean + SD: HD (adult): n = 9, HD age-matched controls (9-14 years): n = 7, HD age-matched controls (6-7 years): n = 6, P<sup>P498L</sup>: n = 3 independent replicates from PBMCs isolated at two distinct time points and at 7-month distance, P<sup>N404Y</sup>: n = 3 replicates from two independent experiments and PBMCs taken at 5-month distance. (B) Dot-plot presentation of CD25<sup>+</sup>FOXP3<sup>+</sup>-gated T cell populations according to A.

#### Figure S6.

**Gating strategy for the analysis of chemokine receptor expression and transcription factor expression in CD4<sup>+</sup> T cells.** Dot plot examples are shown from one adult healthy donor.

#### Figure S7.

Bar graph summary showing percentages of cells expressing TBET, GATA3 or RORγt within CCR-enriched Th-cell subsets and CD3<sup>+</sup>CD4<sup>+</sup>CD25<sup>-</sup> naïve T cells: mean + SD: HD: n = 23, P<sup>P498L</sup>: n = 5 independent replicates from PBMCs isolated at two distinct time points and at 7 and 4-month distance, P<sup>N404Y</sup>: n = 3 replicates from 2 independent experiments and PBMCs taken at 5-month distance. Mann-Whitney test; \*p<0.05, \*\*p<0.01, \*\*\*p<0.001, \*\*\*\*p<0.0001.

Figure S1

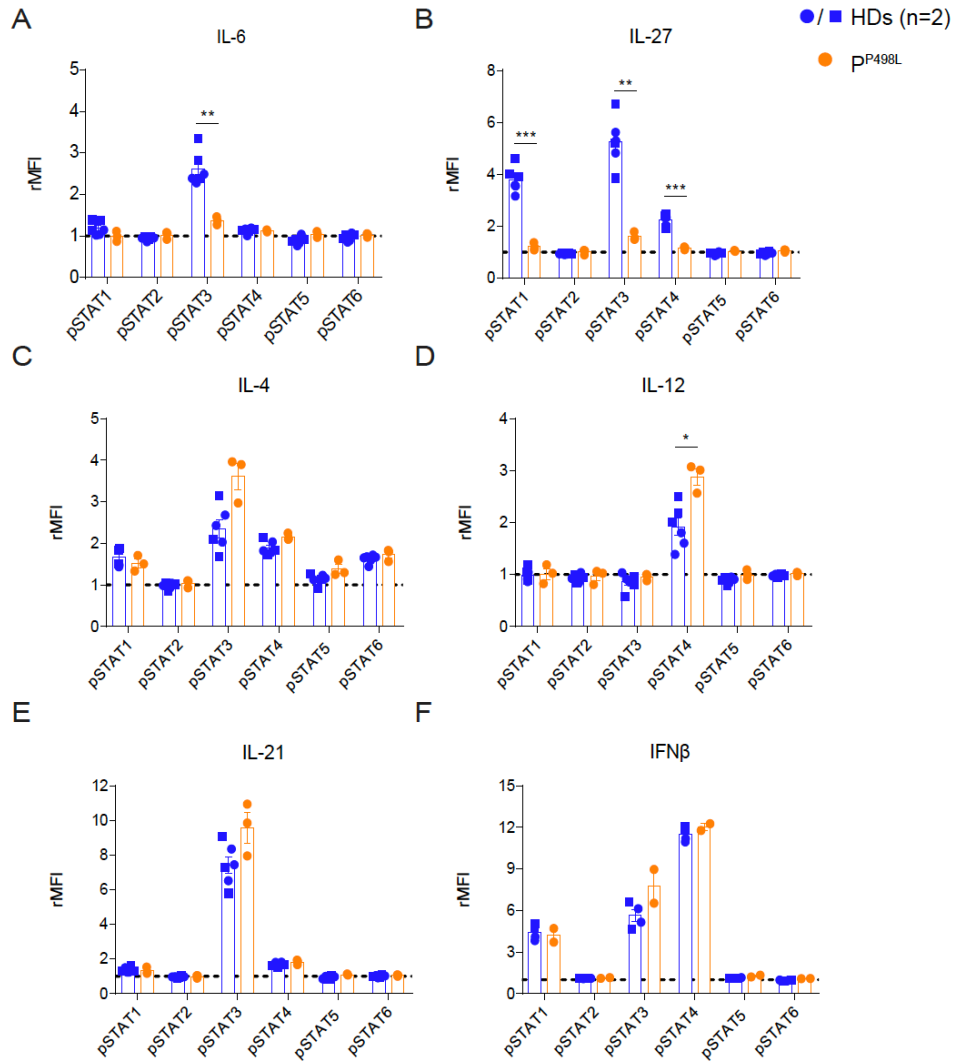

Figure S2

A

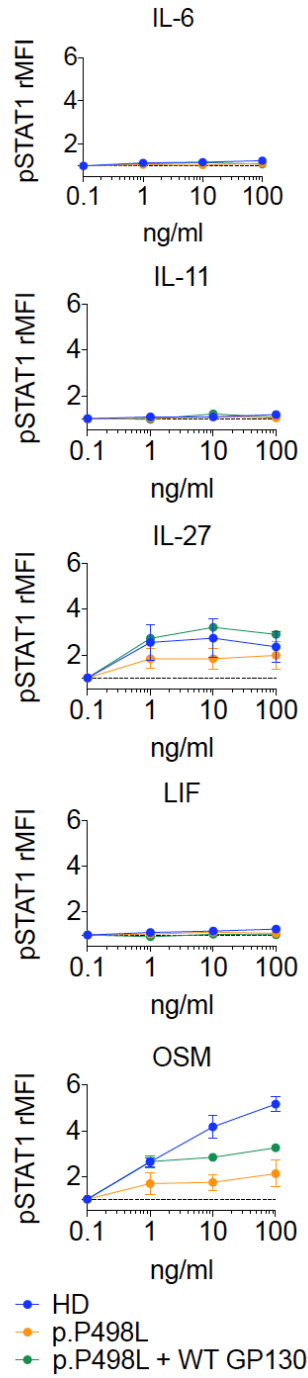

B

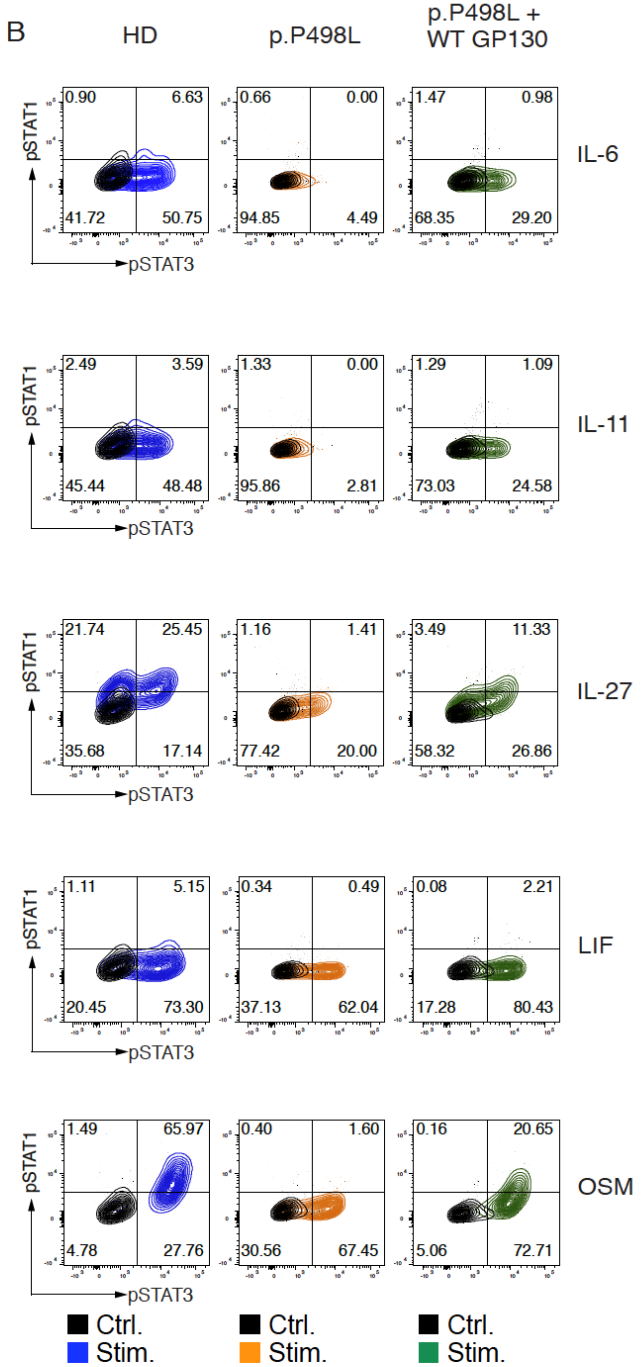

Figure S3

A

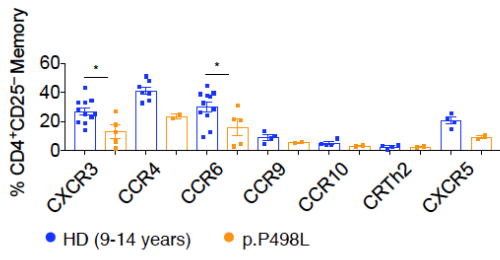

B

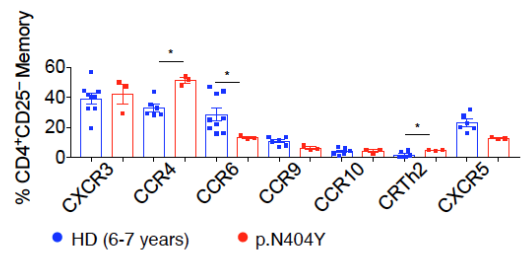

C

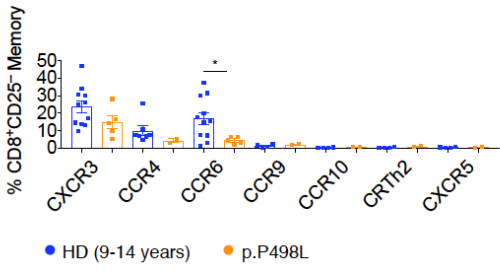

D

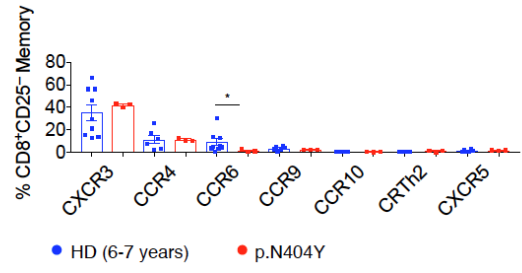

Figure S4

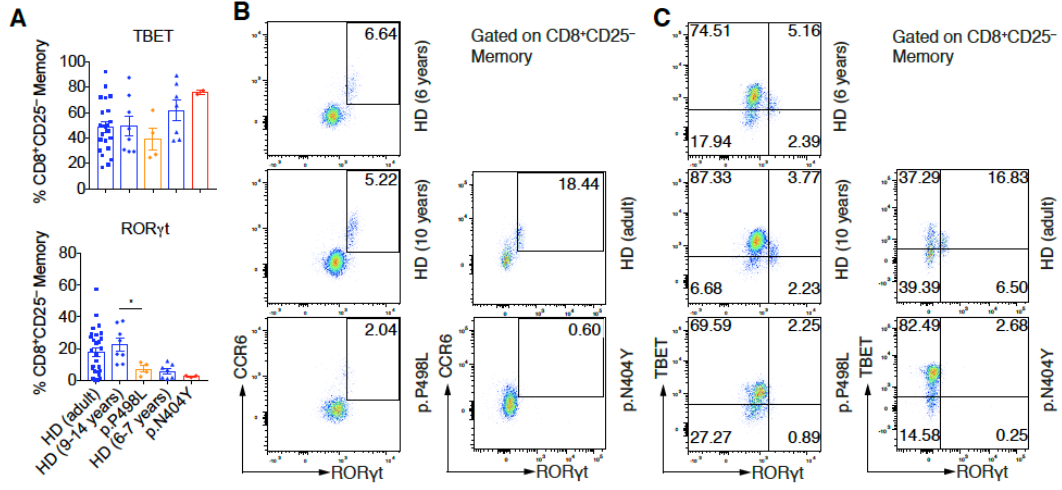

Figure S5

A

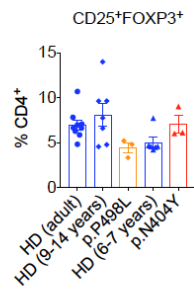

B

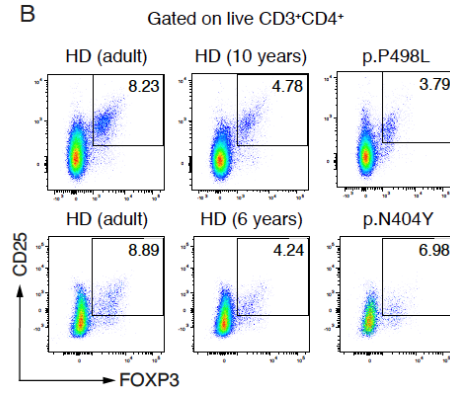

Figure S6

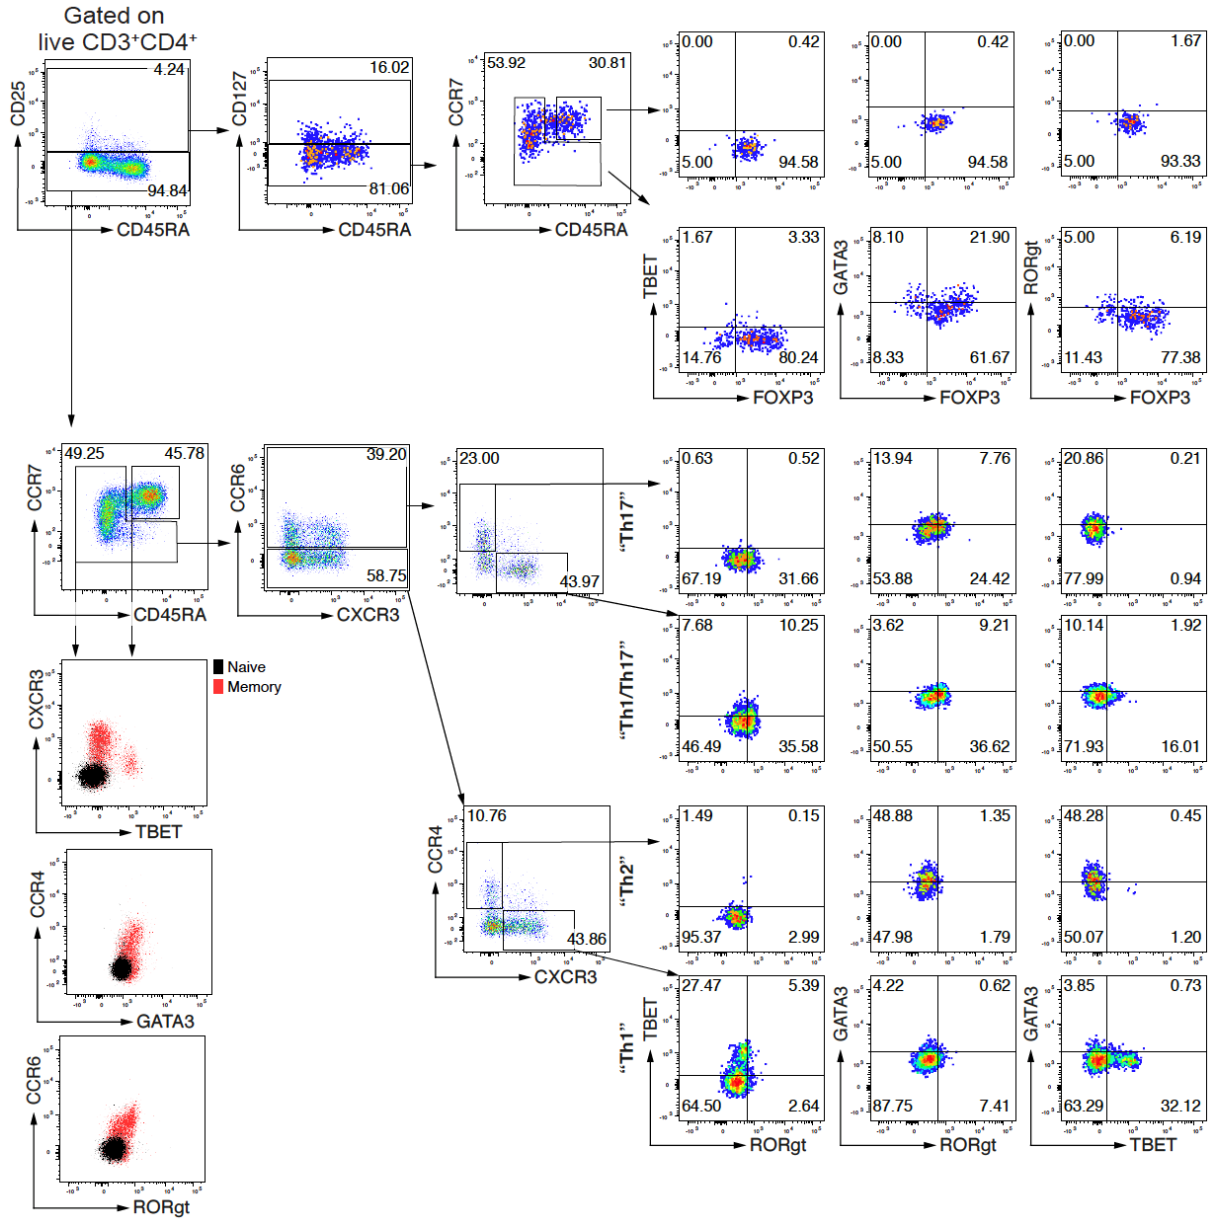

Figure S7

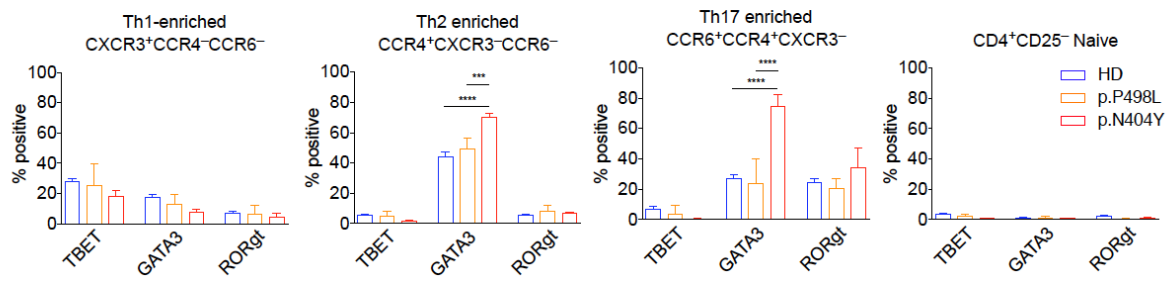

Supplement: 2018.194233.SHAHIN_SUPPL.pdf [file 2018.194233.SHAHIN_SUPPL.pdf]
