# Supplementary material for: Selective loss of function variants in IL6ST cause Hyper-IgE syndrome with distinct impairments of T-cell phenotype and function
Source: PubMed Central journal article supplement — Haematologica. 2018 Oct 11;104(3):609–21. doi: 10.3324/haematol.2018.194233 (PMC6395342; doi:10.3324/haematol.2018.194233), 2019-03
Supplement: 2018_194233-Disclosures_and_Contributions.pdf [file 2018_194233-Disclosures_and_Contributions.pdf]

Haematologica  
HAEMATOL/2018/194233  
Version 4

Selective loss of function variants in IL6ST cause Hyper-IgE Syndrome  
with distinct impairments of T cell phenotype and function

Tala Shahin, Dominik Aschenbrenner, Deniz Cagdas, Sevgi Köstel Bal,  
Cecilia Domínguez Conde, Wojciech Garncarz, David Medgyesi,  
Tobias Schwerd, Betül Karaatmaca, Pınar Gur Cetinkaya, Saliha  
Esenboga, Stephen R. F. Twigg, Andrew Cant, Andrew O. M. Wilkie,  
Ilhan Tezcan, Holm H. Uhlig, and Kaan Boztug

Disclosures: Supported by an ERC Starting grant (agreement 310857), a doctoral fellowship program (Cell Communication in Health and Disease (CCHD)) from the Medical University of Vienna (both to K. B.), the contribution of the Oxford Gastrointestinal biobank, which is supported by the NIHR Oxford Biomedical Research Centre, the Crohn's and Colitis Foundation of America, the Leona M. and the Harry B. Helmsley Charitable Trust (both to H.H.U.), the Department of Health, UK, Quality, Improvement, Development and Initiative Scheme (grant to A.O.M.W.), the Wellcome Trust (project grant 093329 to A.O.M.W. and S.R.F.T.), Investigator Award 102731 and grant 090532/Z/09/Z supporting the Wellcome Trust Centre for Human Genetics both to A.O.M.W. and the Deutsche Forschungsgemeinschaft (grant SCHW1730/1-1 to T. Sch.).

Contributions: T.Sh., D.A., W.G. and T. Sch. performed experiments and analyzed all experimental data. D.C. B.K., P.G.C., S.E., A.O.M.W., S.R.F.T. and A.C. recruited the patients and provided clinical interpretation. C.D.C., S.K.B. and D.M. provided critical input and interpreted data. The manuscript was written by T.S., D.A., H.U. and K.B.. All authors read the manuscript and agreed on publishing.
